# Supplementary material
Source: PubMed Central journal article supplement (PMC7462036)
Supplement: Supp_FigS1.pdf [file Supp_FigS1.pdf]

## Supplementary Data

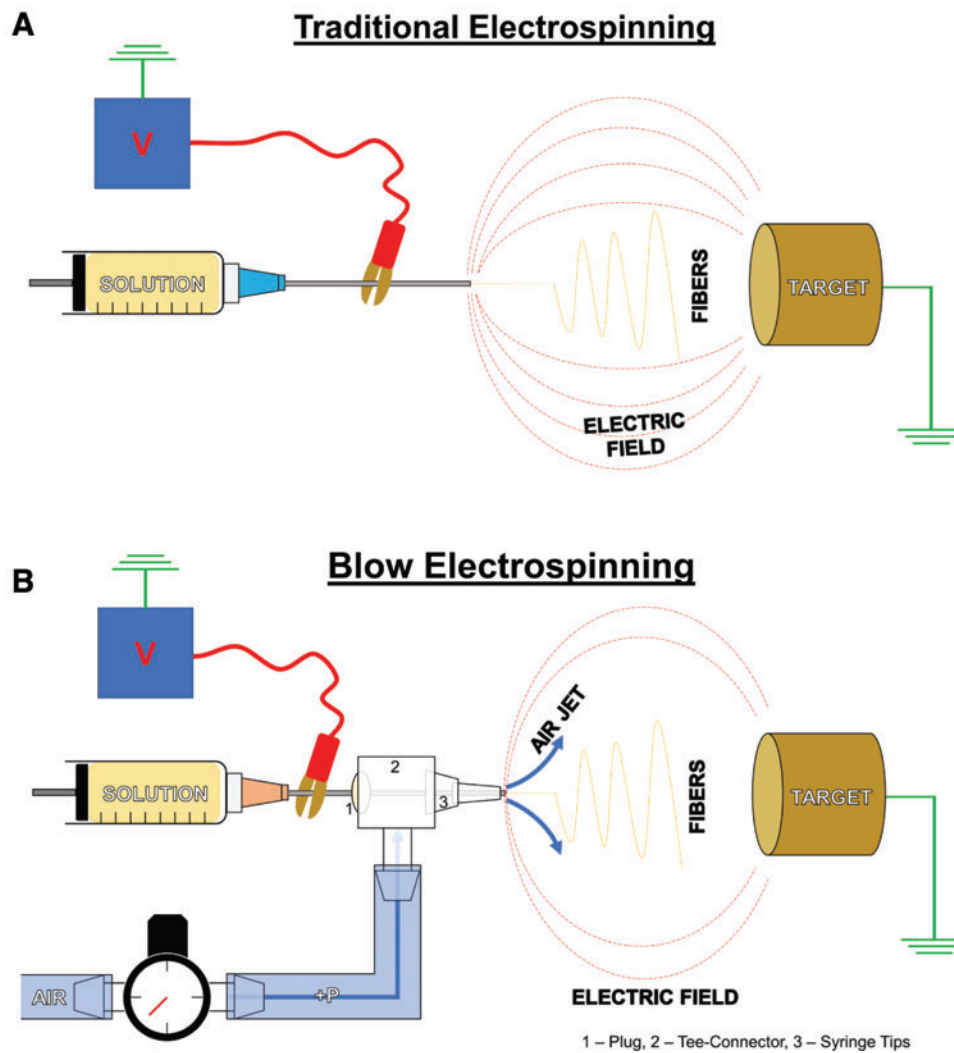

**SUPPLEMENTARY FIG. S1.** Comparison of two electroprocessing types. (A) A diagram depicting a traditional electrospinning system, such as that used to fabricate the PCL scaffold. (B) A schematic of a blow electrospinning setup that is assisted by pressurized air, such as that used for the soy scaffold. PCL, polycaprolactone.
