# Supplementary material
Source: PubMed Central journal article supplement (PMC7462036)
Supplement: Supp_FigS2.pdf [file Supp_FigS2.pdf]

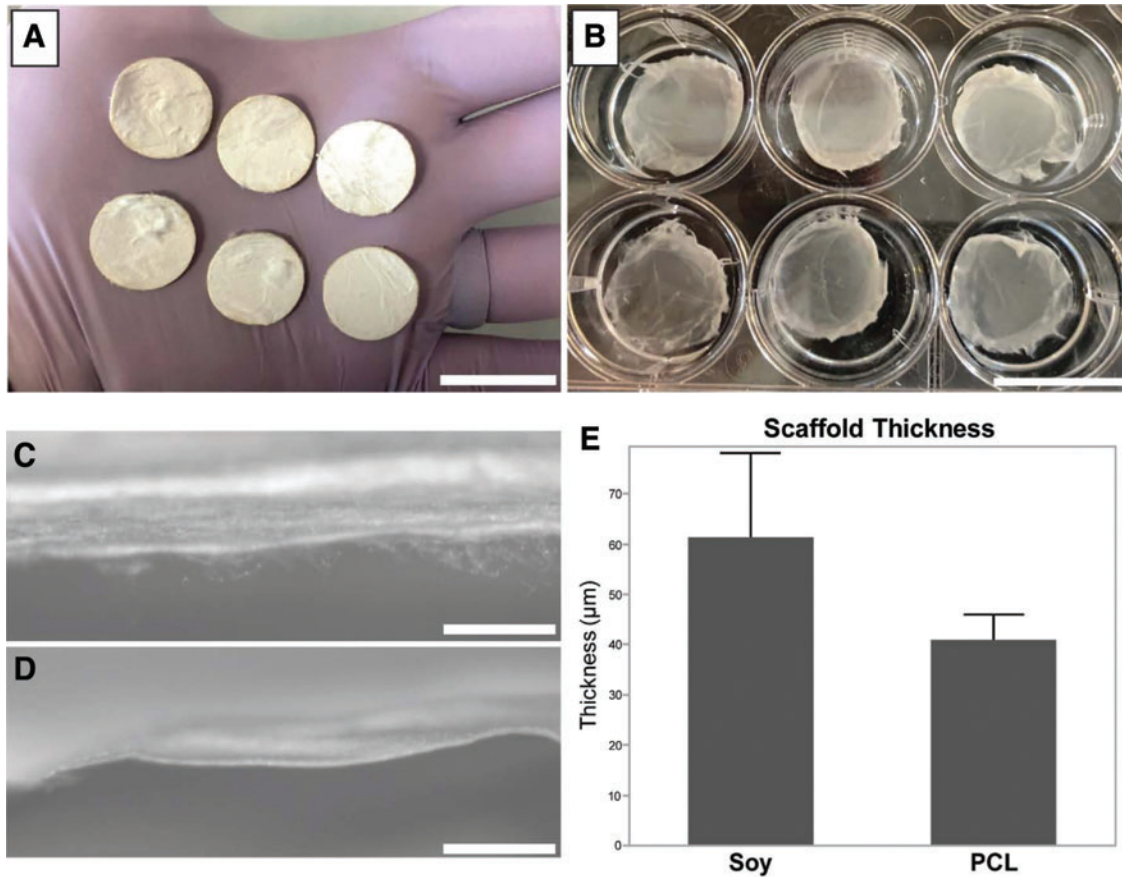

**SUPPLEMENTARY FIG. S2.** Other scaffold fabrication results. **(A)** The appearance of soy scaffolds prior to crosslinking. **(B)** The appearance of soy scaffolds after crosslinking. **(C)** A cross section of the thickness of the soy scaffold. **(D)** A cross section of the thickness of the PCL scaffold. **(C, D)** were obtained by mounting sliced scaffold segments transversally and imaging using a Leica Camera stereomicroscope. **(E)** The average values (mean  $\pm$  SD) obtained from the measurement of the thickness of the soy (61.3  $\mu\text{m}$ ) and PCL scaffolds (41.9  $\mu\text{m}$ ). Average values were obtained by measuring 3 independent samples of each scaffold type 10 times each and averaging. Scale bars A, B = 2 cm, C, D = 500  $\mu\text{m}$ . SD, standard deviation.
