# Supplementary material
Source: PubMed Central journal article supplement (PMC7462036)
Supplement: Supp_FigS3-TableS1.pdf [file Supp_FigS3-TableS1.pdf]

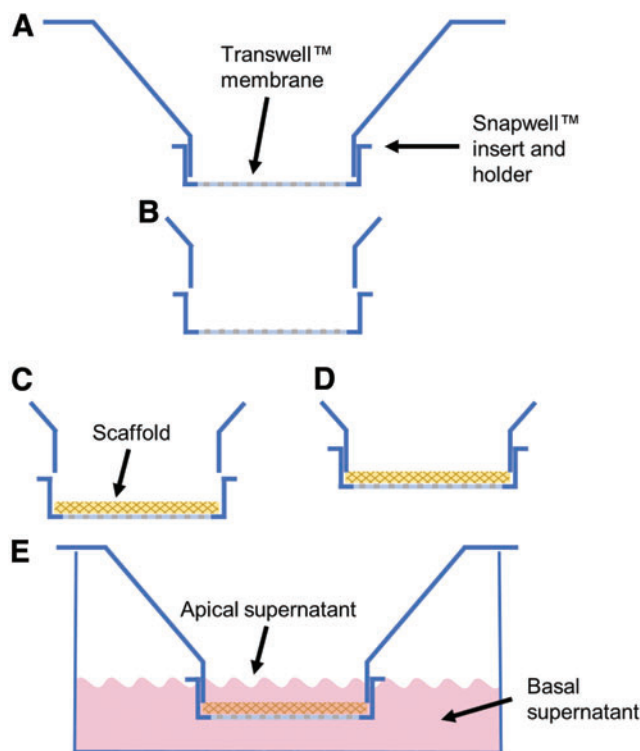

**SUPPLEMENTARY FIG. S3.** Diagram of the method for mounting scaffolds to Transwell™. (A) A cross-sectional diagram of a Corning Snapwell™ insert. (B) The Snapwell™ insert separated from its holder. (C) The scaffold placed in the Snapwell™ insert flush with the Transwell™ membrane. (D) Compression of the scaffold in the insert so that it is mechanically held to the Transwell™. (E) A diagram of the complete scaffold/Transwell™ assembly during culture, including the location of the apical and basal supernatants used for ELISA. ELISA, enzyme-linked immunosorbent assay.

### Supplementary Reference

S1. Sonesson, C., Love, M.I., and Robinson, M.D. Differential analyses for RNA-seq: transcript-level estimates improve gene-level inferences. *F1000Res* **4**, 1521, 2015.

**SUPPLEMENTARY TABLE S1. FIGURE 7B ORDERED GENE NAMES—A LIST OF RETINAL PIGMENT EPITHELIUM SIGNATURE GENES—CLUSTER I ORGANIZED AS PER THE ORDER SHOWN IN THE HEATMAP IN FIGURE 7B<sup>S1</sup>**

| <i>Gene name</i> | <i>Position</i> | <i>Gene name</i> | <i>Position</i> | <i>Gene name</i> | <i>Position</i> |
|------------------|-----------------|------------------|-----------------|------------------|-----------------|
| TYRP1            | 1               | SULF1            | 17              | BMP4             | 33              |
| DCT              | 2               | GEM              | 18              | PLCB4            | 34              |
| SERPINF1         | 3               | PDPN             | 19              | CDH3             | 35              |
| GPNMB            | 4               | TRPM1            | 20              | CDO1             | 36              |
| GJA1             | 5               | SLC6A15          | 21              | LIMCH1           | 37              |
| TTR              | 6               | SORBS2           | 22              | MAB21L1          | 38              |
| BEST1            | 7               | SDC2             | 23              | GAS1             | 39              |
| ALDH1A3          | 8               | FGFR2            | 24              | SOSTDC1          | 40              |
| ENPP2            | 9               | SFRP5            | 25              | RPE65            | 41              |
| FRZB             | 10              | COL8A2           | 26              | CSPG5            | 42              |
| DUSP4            | 11              | MPDZ             | 27              | LHX2             | 43              |
| CHRNA3           | 12              | SLC6A20          | 28              | SIX3             | 44              |
| PTGDS            | 13              | RBP1             | 29              | CLCN4            | 45              |
| TTLL4            | 14              | MYRIP            | 30              | CRX              | 46              |
| EFEMP1           | 15              | GPR143           | 31              | FOXD1            | 47              |
| TFPI2            | 16              | APLP1            | 32              |                  |                 |
